# Supplementary material
Source: publisher figshare collection journal article supplement (https://sage.figshare.com/ndownloader/files/18028064)
Supplement: Supplementary file 1 [file 18028064]

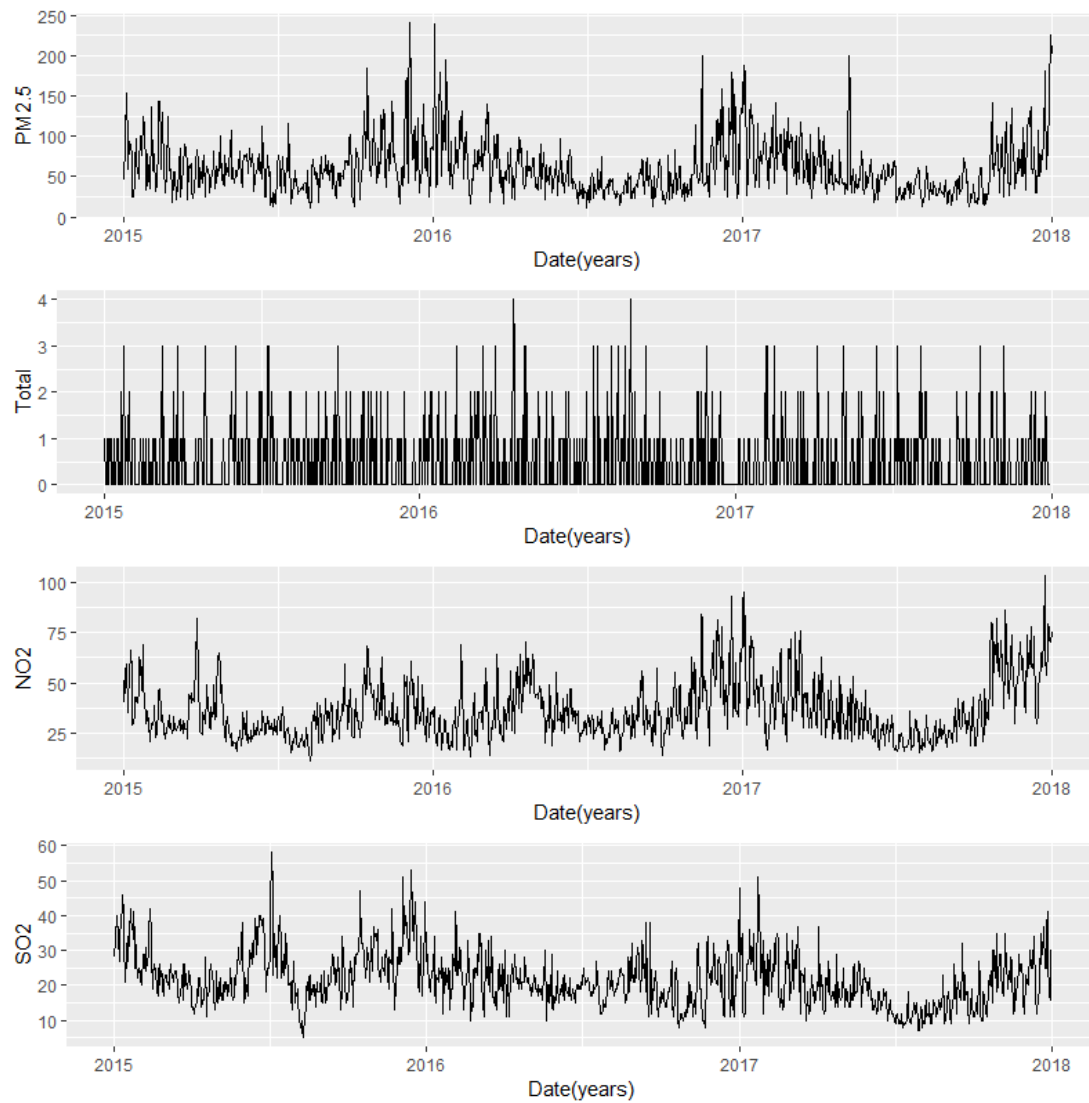

Figure S1: Time-series distribution of daily SLE hospital admissions,  $\text{PM}_{2.5}$ ,  $\text{SO}_2$  and  $\text{NO}_2$  in Bengbu, China, 2015-2017.

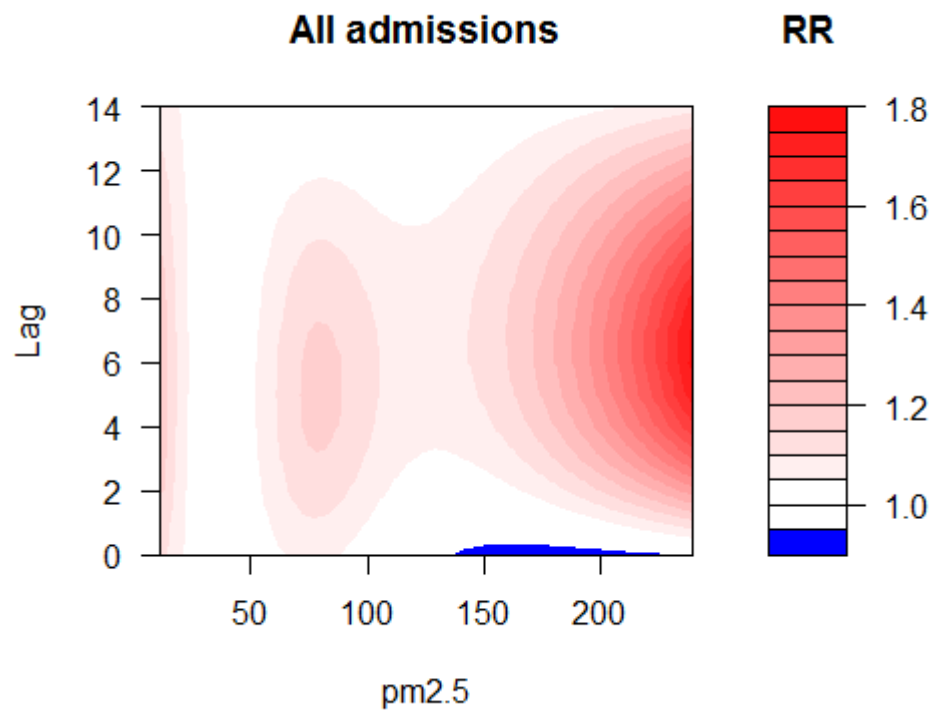

Figure S2: A contour plot of the relative risks (RR) of SLE total hospital admissions along  $PM_{2.5}$  and lag periods.

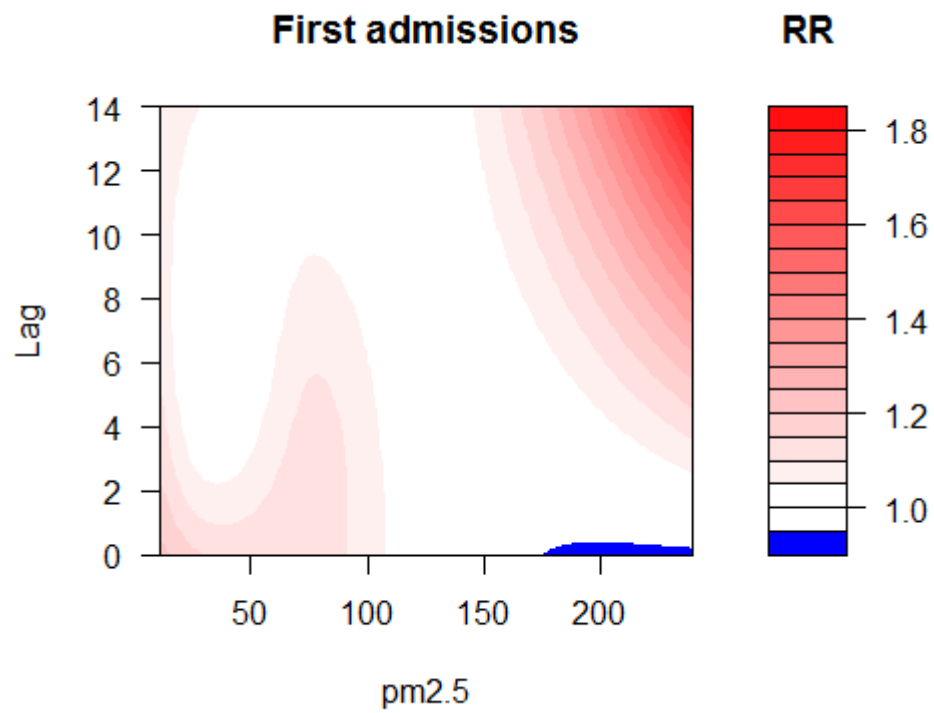

Figure S3: A contour plot of the relative risks (RR) of SLE first hospital admissions along  $PM_{2.5}$  and lag periods.

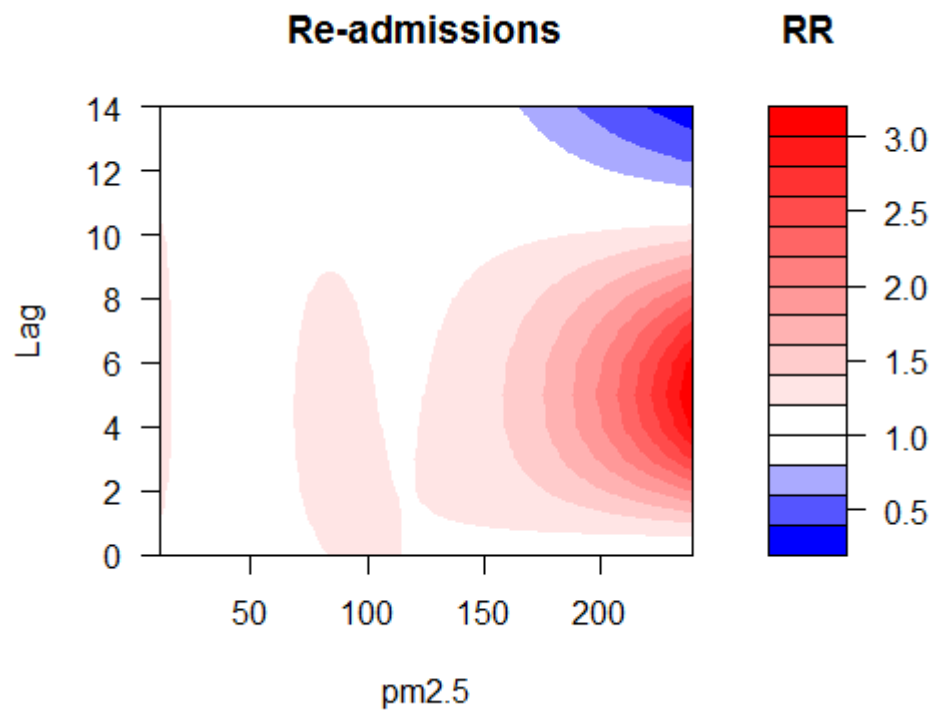

Figure S4: A contour plot of the relative risks (RR) of SLE re-admissions along  $PM_{2.5}$  and lag periods.

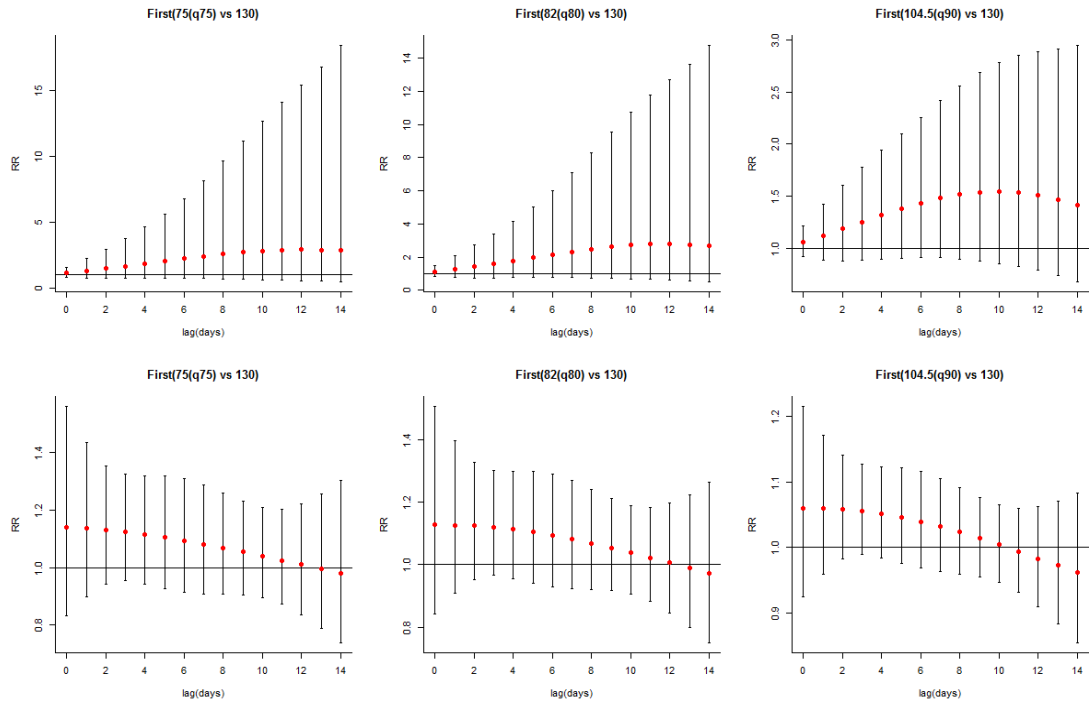

Figure S5: Lag-effects of specific PM<sub>2.5</sub> (75<sup>th</sup>, 75; 80<sup>th</sup>, 82; 90<sup>th</sup>, 104.5) on SLE first hospital admissions with reference of 130µg/m<sup>3</sup>. The first line is the cumulative effect, the second line is the single-day effect

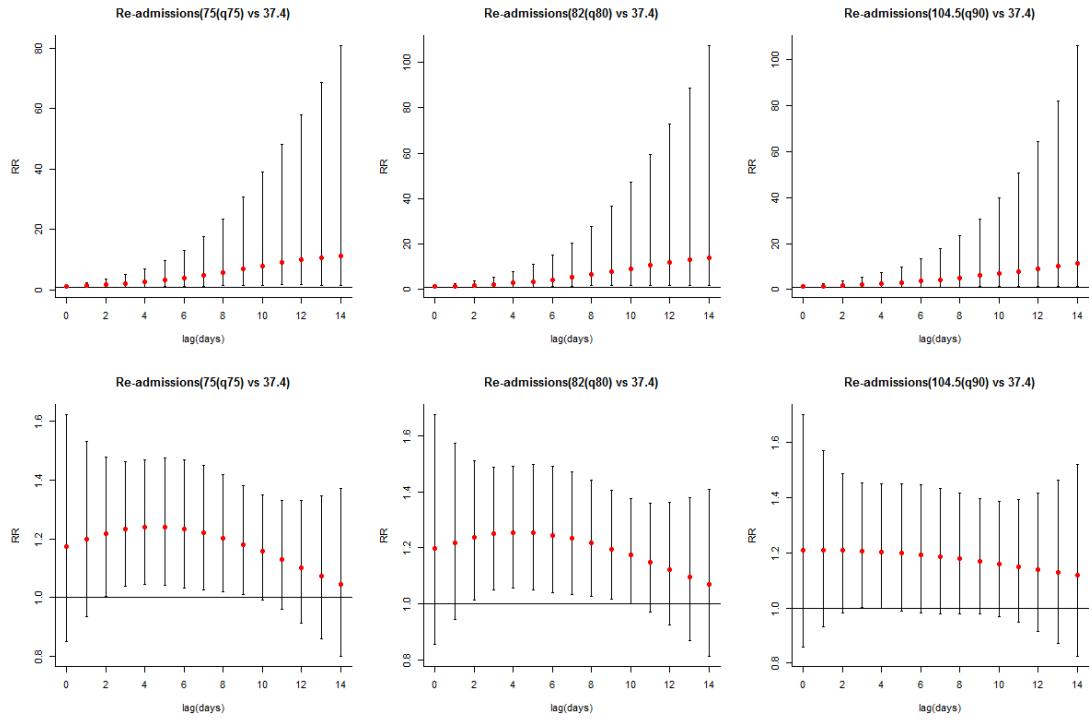

Figure S6: Lag-effects of specific PM<sub>2.5</sub> (75<sup>th</sup>, 75; 82; 90<sup>th</sup>, 104.5) on SLE re-admissions with reference of 37.4µg/m<sup>3</sup>. The first line is the cumulative effect, the second line is the single-day effect

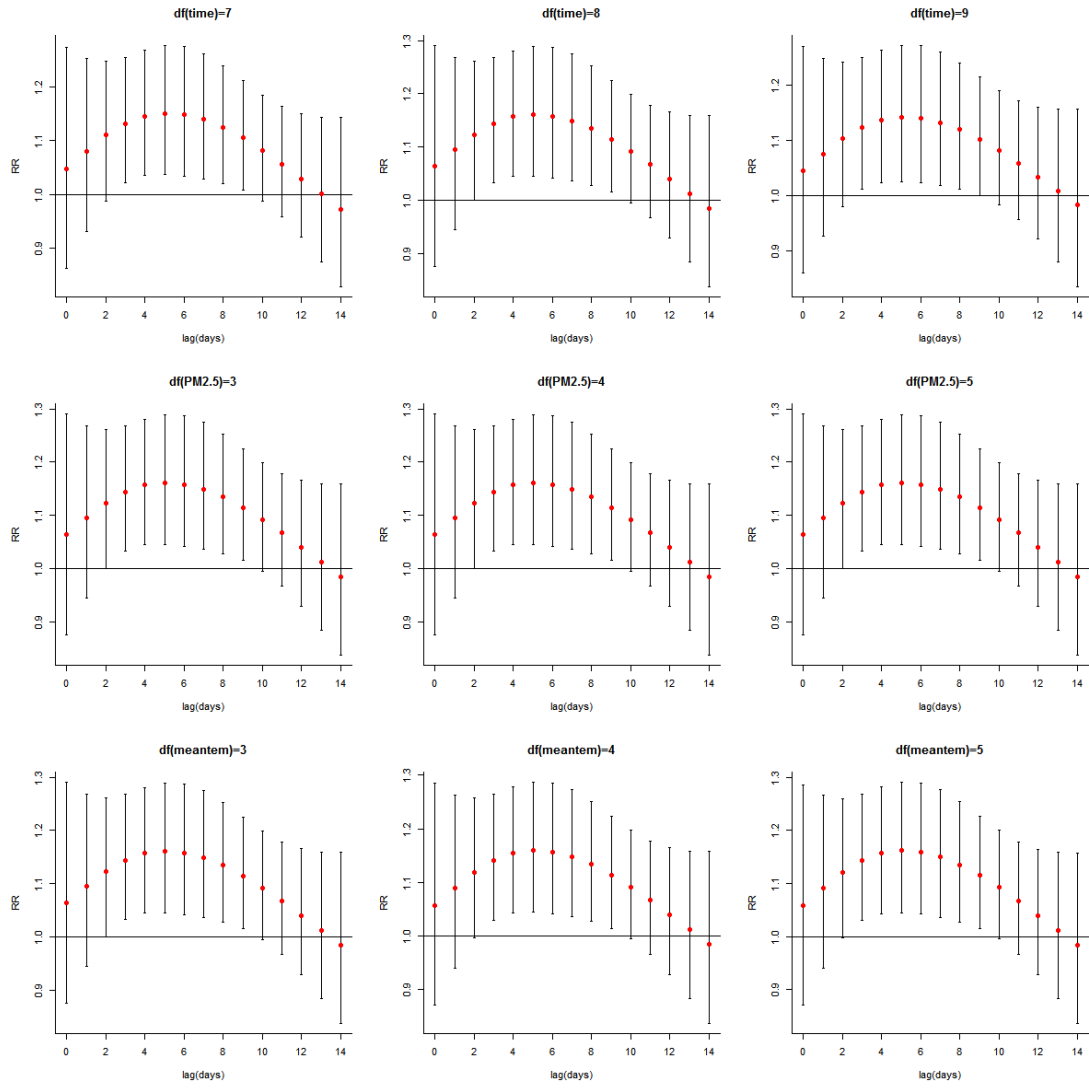

Figure S7: The single-day effect of specific  $\text{PM}_{2.5}$  (75<sup>th</sup>, 75 $\mu\text{g}/\text{m}^3$ ) on SLE when varying the  $df$  (7-9  $df/\text{year}$ ) for time, the  $df$  (3-5  $df$ ) for  $\text{PM}_{2.5}$  and the  $df$  (3-5  $df$ ) for mean temperature.

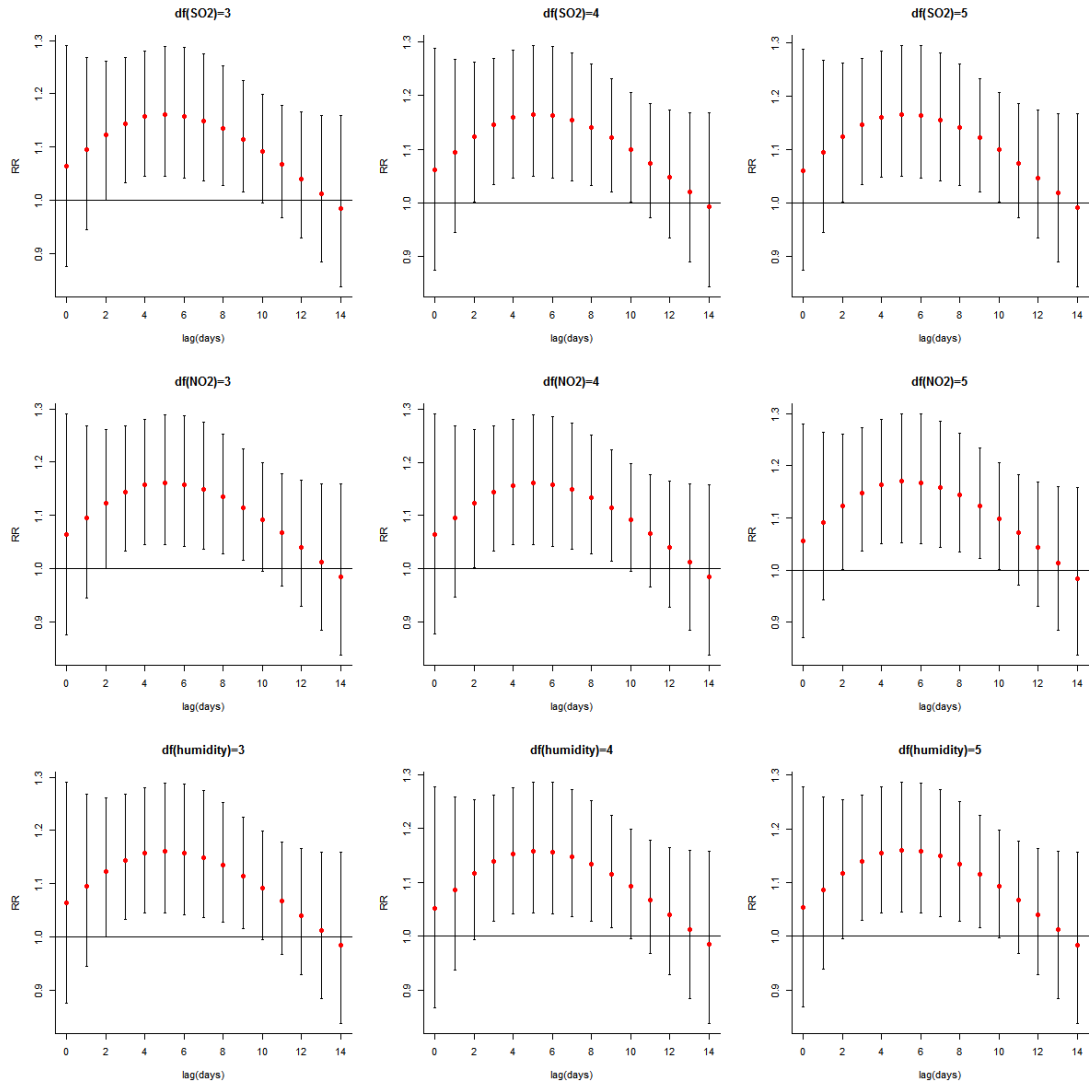

Figure S8: The single-day effect of specific PM<sub>2.5</sub> (75<sup>th</sup>, 75µg/m<sup>3</sup>) on SLE when varying the *df* (3-5 *df*) for SO<sub>2</sub>, the *df* (3-5 *df*) for NO<sub>2</sub> and the *df* (3-5 *df*) for humidity.



Table S1 The AIC values of models for various lag period from lag1 to lag30.

|            |          |          |          |          |          |          |
|------------|----------|----------|----------|----------|----------|----------|
| Lag day(s) | 1        | 2        | 3        | 4        | 5        | 6        |
| AIC        | 123.6596 | 123.3496 | 122.9547 | 122.1504 | 122.828  | 122.3185 |
| Lag day(s) | 7        | 8        | 9        | 10       | 11       | 12       |
| AIC        | 123.0622 | 123.417  | 123.1556 | 122.9114 | 123.026  | 123.1058 |
| Lag day(s) | 13       | 14       | 15       | 16       | 17       | 18       |
| AIC        | 123.1573 | 123.0606 | 123.2883 | 123.379  | 123.7485 | 123.3159 |
| Lag day(s) | 19       | 20       | 21       | 22       | 23       | 24       |
| AIC        | 123.6085 | 123.5558 | 123.7392 | 123.8075 | 123.9491 | 124.0357 |
| Lag day(s) | 25       | 26       | 27       | 28       | 29       | 30       |
| AIC        | 123.4872 | 123.797  | 123.819  | 124.2743 | 124.2097 | 124.454  |

AIC, Akaike Information Criterion.
